# Supplementary material
Source: PubMed Central journal article supplement (PMC6611170)
Supplement: NIHMS1028049-supplement-1.pdf [file NIHMS1028049-supplement-1.pdf]

**SUPPLEMENTAL INFORMATION**

**Dose and diet – Sources of arsenic intake in mouse *in utero* exposure scenarios**

**Manuela Murko<sup>1</sup>, Brittany Elek<sup>2</sup>, Miroslav Styblo<sup>3</sup>, David J. Thomas<sup>2</sup>, Kevin A. Francesconi<sup>1</sup>**

1. Institute of Chemistry, University of Graz, Austria
2. Pharmacokinetics Branch, Integrated Systems Toxicology Division, National Health and Environmental Effects Laboratory, Office of Research and Development, U.S. Environmental Protection Agency, Research Triangle Park, North Carolina 27709 USA
3. Department of Nutrition, Gillings School of Global Public Health, The University of North Carolina, Chapel Hill, North Carolina 27719 USA

**Running title** – Evaluating aggregate arsenic exposure in utero

**Disclaimer** - Preparation of this document has been funded by the U.S. Environmental Protection Agency. This document has been subjected to review by the National Health and Environmental Effects Research Laboratory (NHEERL) and approved for publication. Approval does not signify that the contents reflect the views of the Agency, nor does mention of trade names or commercial products constitute endorsement or recommendation for use.

**Supplemental Figure 1 – Structures of arsenic species of potential interest**

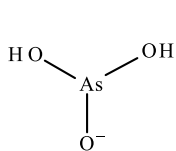

arsenite  
As(III)

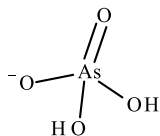

arsenate  
As(V)

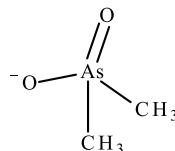

dimethylarsinate  
DMA

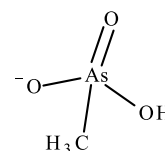

methylarsonate  
MA

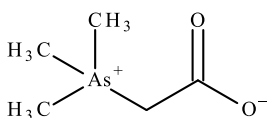

arsenobetaine  
AB

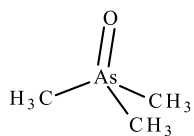

trimethylarsine oxide  
TMAO

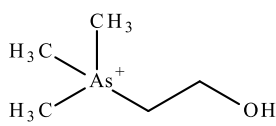

arsenocholine  
AC

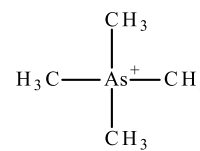

tetramethylarsonium ion  
TETRA

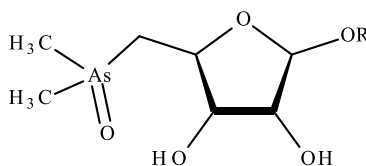

arsenosugar

glycerol: R= CH<sub>2</sub>CH(OH)CH<sub>2</sub>OH

phosphate: R= CH<sub>2</sub>CH(OH)CH<sub>2</sub>(OPO<sub>3</sub>H)CH<sub>2</sub>CH(OH)CH<sub>2</sub>OH

sulfonate: R=CH<sub>2</sub>CH(OH)CH<sub>2</sub>SO<sub>3</sub>H

sulfate: R=CH<sub>2</sub>CH(OH)CH<sub>2</sub>OSO<sub>3</sub>H

**Supplemental Information Table S1** - Concentrations of total arsenic and of water-extractable arsenicals in natural ingredient rodent diets (1-11) or a purified ingredient rodent diet (12)

| Diet | Total As (µg/kg) <sup>a</sup> |   |     | Water Extractable As (µg/kg) <sup>b</sup> |                  |      |      |     |           |                | Sum of quantified species <sup>e</sup> in µg As/kg (% Total As) |
|------|-------------------------------|---|-----|-------------------------------------------|------------------|------|------|-----|-----------|----------------|-----------------------------------------------------------------|
|      |                               |   |     | EE <sup>c</sup> (%)                       | iAs <sup>d</sup> | DMAs | TMAO | AB  | SO3-sugar | Glycerol sugar |                                                                 |
| 1    | 128                           | ± | 5   | 41                                        | 32               | 2.7  | <4   | <2  | 9.2       | 3.6            | 48<br>(38)                                                      |
| 2    | 130                           | ± | 13  | 27                                        | 31               | <2   | <4   | <2  | <2        | <2             | 31<br>(24)                                                      |
| 3    | 91.0                          | ± | 2.0 | 30                                        | 22               | <2   | <4   | <2  | <2        | <2             | 22<br>(24)                                                      |
| 4    | 95.5                          | ± | 3.1 | 24                                        | 19               | <2   | <4   | <2  | <2        | <2             | 19<br>(20)                                                      |
| 5    | 62.2                          | ± | 2.3 | 25                                        | 13               | <2   | <4   | <2  | <2        | <2             | 13<br>(21)                                                      |
| 6    | 363                           | ± | 7   | 34                                        | 40               | 19   | 7.6  | 45  | <2        | 2.1            | 114<br>(31)                                                     |
| 7    | 100                           | ± | 2   | 40                                        | 32               | <2   | <4   | <2  | 2.6       | <2             | 34<br>(34)                                                      |
| 8    | 79.4                          | ± | 2.3 | 26                                        | 17               | <2   | <4   | <2  | <2        | <2             | 17<br>(21)                                                      |
| 9    | 405                           | ± | 19  | 36                                        | 50               | 19   | 6.2  | 51  | <2        | <2             | 126<br>(31)                                                     |
| 10   | 361                           | ± | 6   | 53                                        | 29               | 13   | 12   | 128 | <2        | <2             | 182<br>(50)                                                     |
| 11   | 138                           | ± | 3   | 26                                        | 30               | <2   | <4   | 2.6 | <2        | <2             | 33<br>(24)                                                      |
| 12   | 12.8                          | ± | 0.7 | 44                                        | 4.6              | <2   | <4   | <2  | <2        | <2             | 4.6<br>(36)                                                     |

- Total arsenic concentration in homogenized sample of rodent diet.
- Concentration of arsenicals in the water extracts of rodent diets.
- Extraction efficiency (EE) is percentage of total arsenic present in a homogenized diet sample that is present in the water extract of that diet.
- Sum of iAs<sup>III</sup> and iAs<sup>V</sup>.
- Upper - Sum of concentrations of arsenic species quantified in water extract. Lower – Sum of concentrations of arsenic species quantified in water extract as a percentage of total arsenic concentration in homogenized sample of rodent diet.
